# Supplementary material for: Androgen-induced miR-135a acts as a tumor suppressor through downregulating RBAK and MMP11, and mediates resistance to androgen deprivation therapy
Source: PubMed Central journal article supplement (PMC5239475; doi:10.18632/oncotarget.9992), 2016-06-14
Supplement: oncotarget-07-51284-s001.pdf [file oncotarget-07-51284-s001.pdf]

## Androgen-induced miR-135a acts as a tumor suppressor through downregulating RBAK and MMP11, and mediates resistance to androgen deprivation therapy

### Supplementary Materials

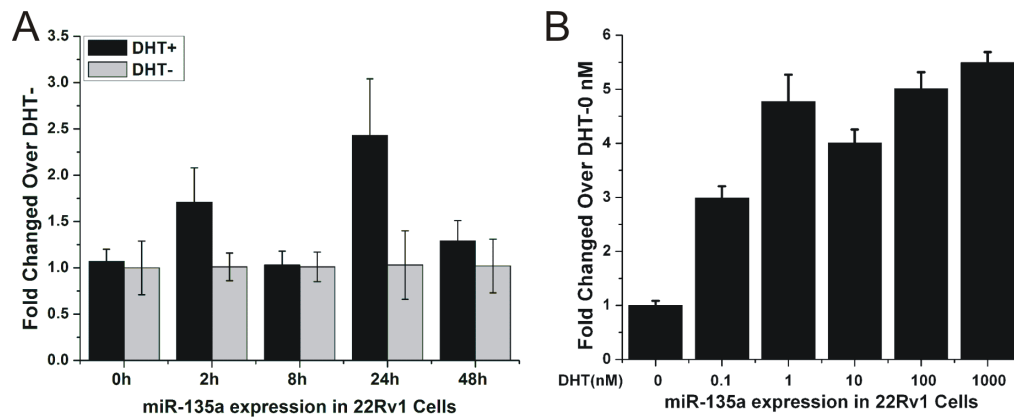

Supplementary Figure S1: qRT-PCR analysis of miR-135a expression with androgen-starved for 72 h and treated with 10 nM DHT at different time points (A) and doses (B) in 22Rv1. Significance was defined as  $p < 0.05$  ( $*p < 0.05$ ;  $**p < 0.01$ ;  $***p < 0.001$ ).

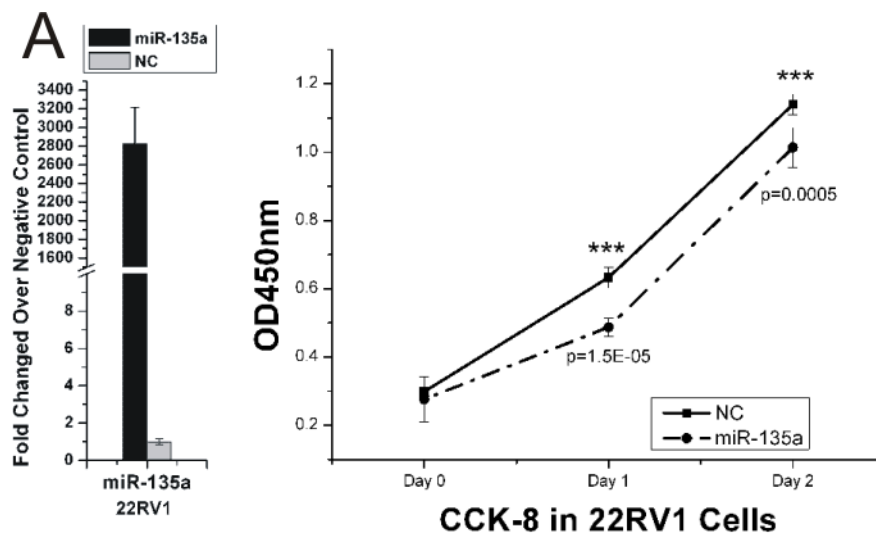

Supplementary Figure S2: Cell proliferation analysis was performed with CCK-8 assay in 22Rv1. ( $*p < 0.05$ ;  $**p < 0.01$ ;  $***p < 0.001$ ).

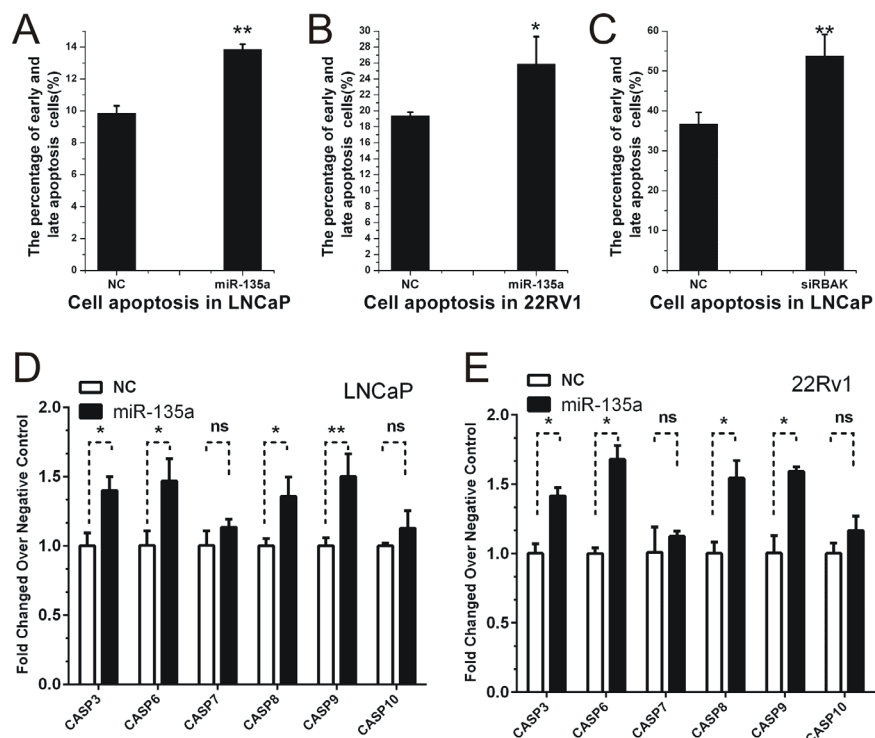

**Supplementary Figure S3: RT-PCR was used to detect CASP3, CASP6, CASP7, CASP8, CASP9 and CASP10 in LNCaP and 22Rv1 cells.** The cell apoptosis analysis results presented as mean  $\pm$  SD ( $n = 3$ ). Significance was defined as  $p < 0.05$  (\* $p < 0.05$ ; \*\* $p < 0.01$ ; \*\*\* $p < 0.001$ ).

**Supplementary Table S1: Primers used for ChIP-PCR, RT-PCR, clone, mutation and transfection**

|         | Forward                     | Reverse                   |
|---------|-----------------------------|---------------------------|
| KIF3B   | AGGCCAGCTGGAAAAAC           | ACCTTCCCTCCGCTTCTCT       |
| MTDH    | AGTTGCTTGGTCCCAGTAGC        | GCCCATGACAACCCAGATAG      |
| RNF138  | CATTTTCTTTCAGTTACATGGGTGT   | AACTGGAAAACACTATGGTCAAAA  |
| PTK2    | TGAGGGAGAAGTATGAGCTTGC      | TTGGCAAATAACGAATTCTCAA    |
| VASH2   | AACAGATGTTATTTTCAGTCTCAGTGC | TTCCTTCTATAAACACCTTCAGTC  |
| FKBP1A  | TCCCTCTGCTGATCTCAGTTT       | AGGACAGCAAAGGGGTGAG       |
| RBAK    | CCACCAGTAAGAAAATGAACAGG     | TTGTACATACATGAAGTCAAAA    |
| RNF43   | TGATTTTGGATTTTCTGTAAAGTGT   | CAGAAATTTACTCCGGGATGA     |
| RALBP1  | CTGGGTCTGCTGTCTGAGC         | AGGCCAGTGGACTTGTGTG       |
| MMP11   | TCCTGAGGTCAGGCTTGGT         | CAGATTTCCAGGATTGTCAGC     |
| siNC    | UUCUCCGAACGUGUCACGUdTdT     | ACGUGACACGUUCGGAGAAdTdT   |
| siMMP11 | CCUUUACUGAGGUGCACGAdTdT     | UCGUGCACCUCAGUAAAGGdTdT   |
| siRBAK  | AUGUGUAAUCAGAGUAGACdTdT     | CUGCUUGUAUCAAUAGCAAdTdT   |
| U1      | ACAGCATATGGCATTGCACAG       | TGCAATTAAGGTCAAAGCTGACT   |
| U2      | GTGCTTAACGTTTTTGGTCAAAGTT   | GCCATCTAACAACACCCAAGT     |
| U3      | CCTGTGGATGCCACCTCTTA        | AGAGGAGGCACTAAACGTGTAATAA |
| U4      | AGACTTCCCATTGCAAGCATA       | AACTCTAAGCACACCCAGCA      |
| U5      | GGCCAGGTTGTAAAGCACT         | CATCGGCCAGAACTCTTAGC      |
| U6      | GCTCTGTCACCAACACTCACT       | GCTGCCTTTCTTGTGTGCTTT     |
| D1      | CGAGATTCCCTTGTCTCTCC        | CCTCATATGTGGAATGGGGAT     |
| D2      | GTGACTCACGTCAGCACCTG        | ACATCGAGAGATACTTGTGGAC    |
| U6-pGL  | ATGGGGCCTCATTGTGCC          | GAAGATGAACTCTGCGTGGC      |

|                           |                                                  |                                                     |
|---------------------------|--------------------------------------------------|-----------------------------------------------------|
| D1-pGL                    | CAGTGTTATGCTGTTTCGCACA                           | AGCCAGATTGTGCAAGAGTC                                |
| Mut-D1                    | GTTTTCCCCAAAGGTTTGTCTATTTAC<br>TTTTTCAACTTTGATC  | GAAACAAACCTTTGGGGAAAACACTCCCAGA<br>GGGAACAAAAAAGG   |
| Mut-D2                    | TTTTCCCCAAAGGTTTCCCGTTAAAA<br>TTAAGGTCAAATGTCCAC | AACGGGAAACCTTTGGGGAAAAGTATTTAAGA<br>GTTAGCATGGTGTAC |
| NC                        | ACCCTCGTTGCCAAGAATCTA                            | ACTACCAGCAATATAAGCAGCCA                             |
| 3'UTR RBAK                | TCAAAGATCCCTCAAGTGCCT                            | GATCTGCAATCCACCTCCA                                 |
| 3'UTR MMP11               | GACTGAGCCCATGTCTCCTC                             | AGAAAACAACCTGTGTTTAATGACAA                          |
| 3'UTR RBAK-mut            | TGTTATGGTTACACAGAAATAATGAA<br>GGTGTTAATTTGGC     | ATTTCTGTGTAACCATAACAGGTCTTGATATT<br>AGAAAT          |
| 3'UTR MMP11-<br>mut       | TCCTCCGGTTACTGTAAATGTGTGTAC<br>AGTGTGTATAAACC    | TTTACAGTGTAACCGGAGGATAGCAGTGCTGCGA<br>AAAGGGCTT     |
| hsa-mir-135a<br>mimic     | UAUGGCUUUUUAUCCUAUGUGA                           | ACAUAGGAAUAAAAAGCCAUAUU                             |
| hsa-mir-135a<br>inhibitor | UCACAUAGGAAUAAAAAGCCAUA                          |                                                     |
